# Supplementary material
Source: MDPI journal article supplement (https://www.mdpi.com/1424-2818/16/5/279)
Supplement: s1 [file s1]

## Supplementary Materials

***Roseateles agri* sp. nov., a new species isolated from fresh soil in Uiwang, South Korea**

Department of Life Science, College of Natural Sciences, Kyonggi University, Suwon, Gyeonggi-Do 16227,  
Republic of Korea

Yelim You and Jaisoo Kim

Contents category: New Taxa; Subsection:

\*Corresponding author: Jaisoo Kim.

Tel: +82-31-249-9648; Fax: +82-31-249-9604

Email: [jkimtamu@kgu.ac.kr](mailto:jkimtamu@kgu.ac.kr)

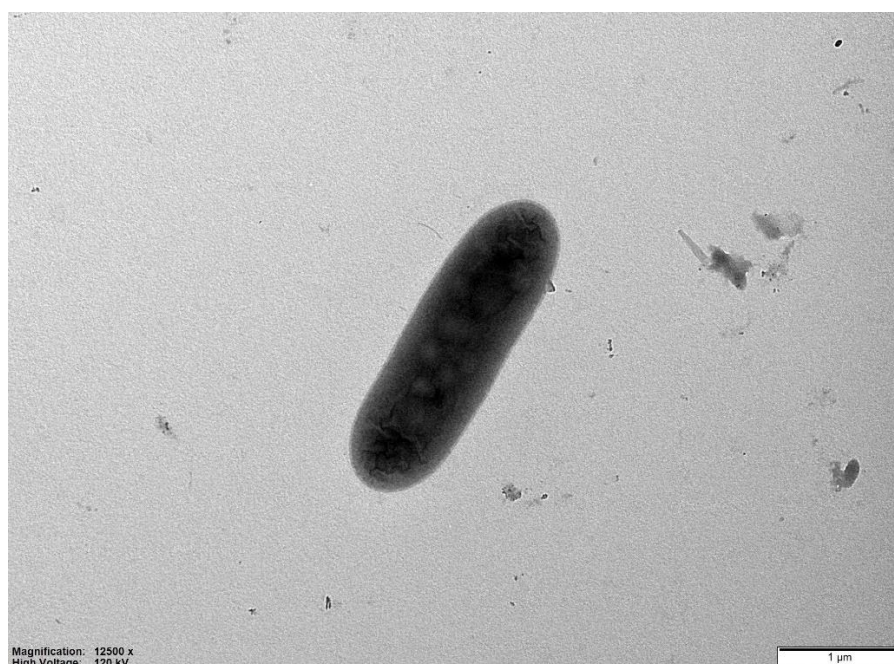

**Figure S1.** Transmission electron microscopy of strain R3-3<sup>T</sup> grown on R2A medium plates for 2 days at 28°C. Bar 1 μm

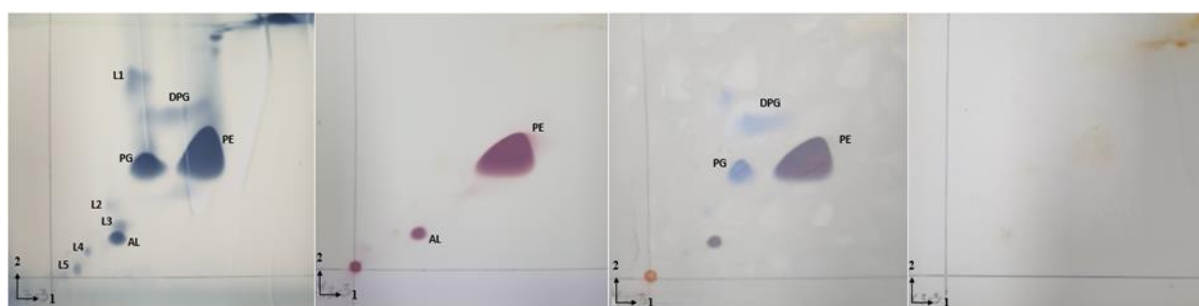

**Figure S2.** Polar lipid profile of strain R3-3<sup>T</sup>. PE - phosphatidylethanolamine; PG - phosphatidylglycerol; DPG - diphosphatidylglycerol; AL– unidentified aminolipid, L - unidentified polarlipid.

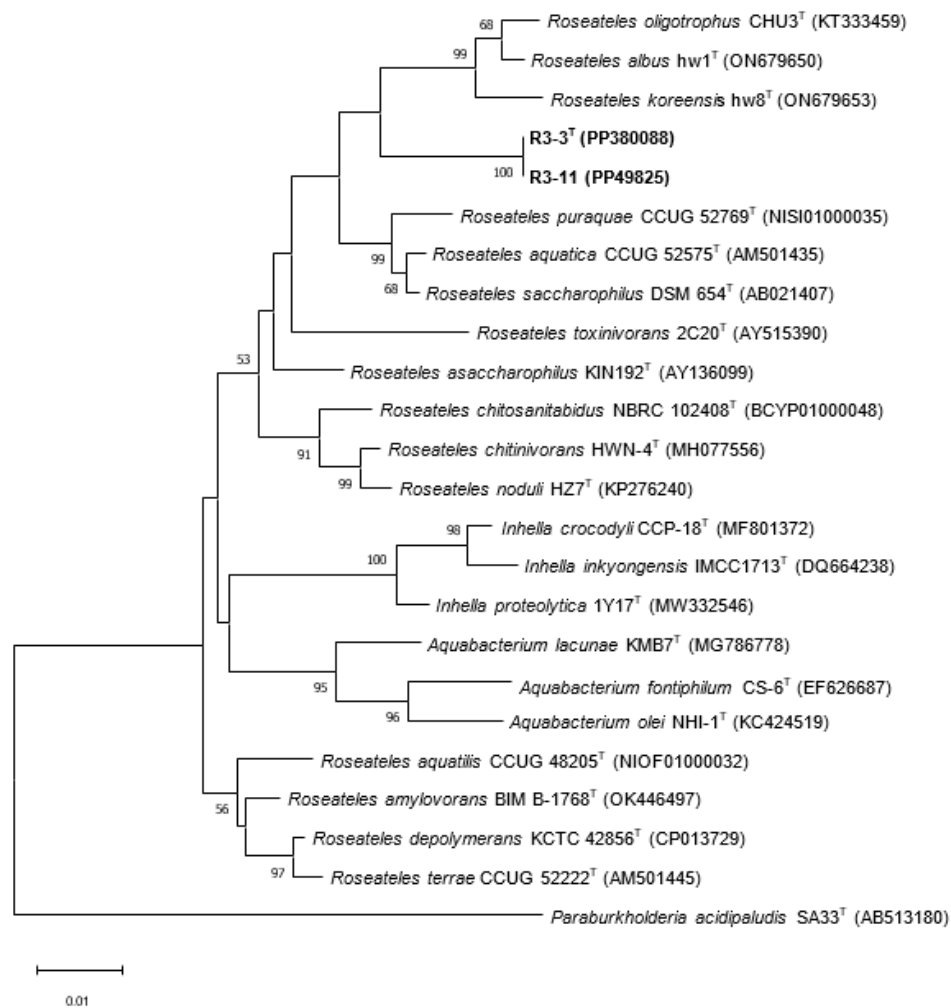

**Figure S3.** The phylogenetic tree was reconstructed with the neighbor-joining method based on 16S rRNA gene sequences of strains R3-3<sup>T</sup>, R3-11, and some related strains based on 16S sequencing. *Paraburkholderia acidipaludis* SAA33<sup>T</sup> was used as an outgroup. Numbers at branch nodes represent confidence levels (values > 50% are shown) from 1000 replicate bootstrap samplings. GenBank accession numbers are shown in parentheses. Bar, 0.01 substitutions per nucleotide position.

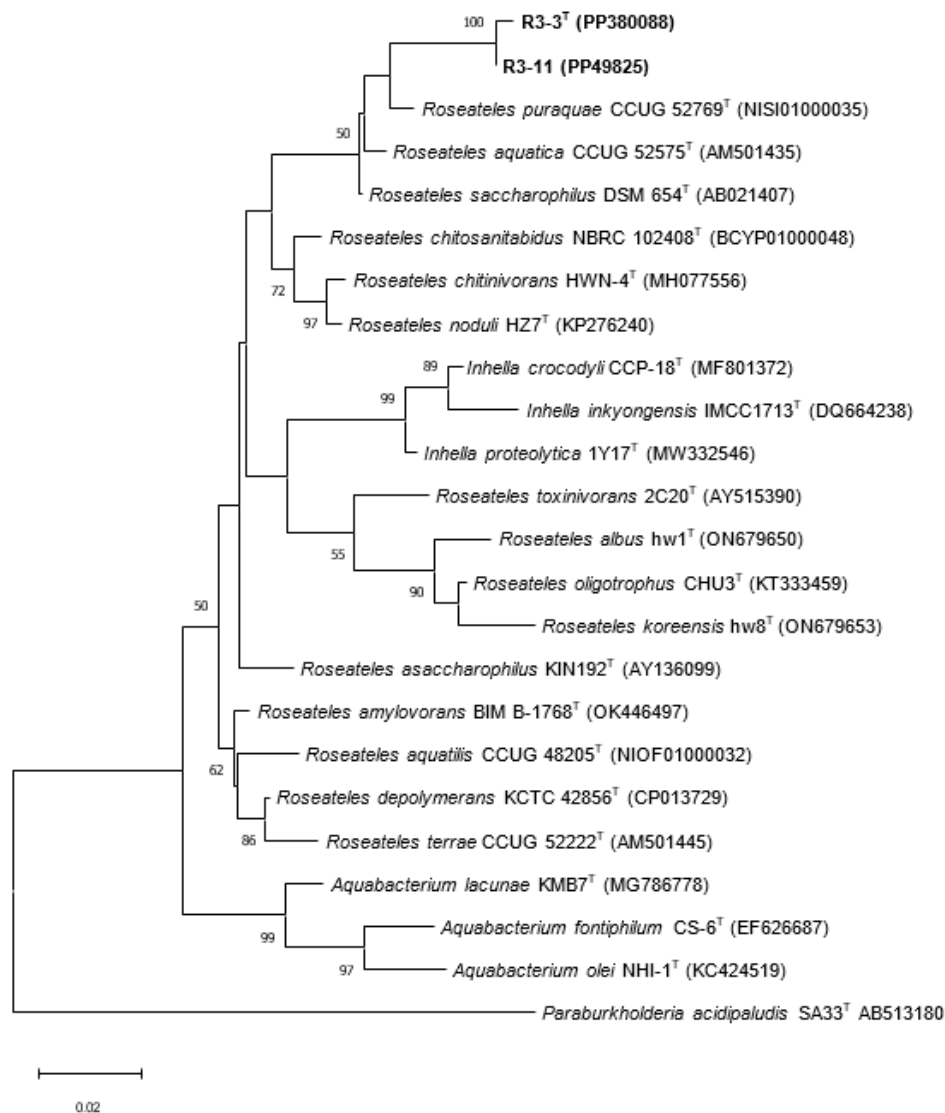

**Figure S4.** Phylogenetic tree reconstructed with the maximum likelihood method based on 16S rRNA gene sequences of strains R3-3<sup>T</sup>, R3-11, and some related strains based on 16S sequencing. *Paraburkholderia acidipaludis* SAA33<sup>T</sup>. Numbers at branch nodes represent confidence levels (values >50% are shown) from 1000 replicate bootstrap samplings. GenBank accession numbers are given in parentheses. Bar, 0.02 substitution per nucleotide position. Evolutionary analyses were conducted in MEGA 11.

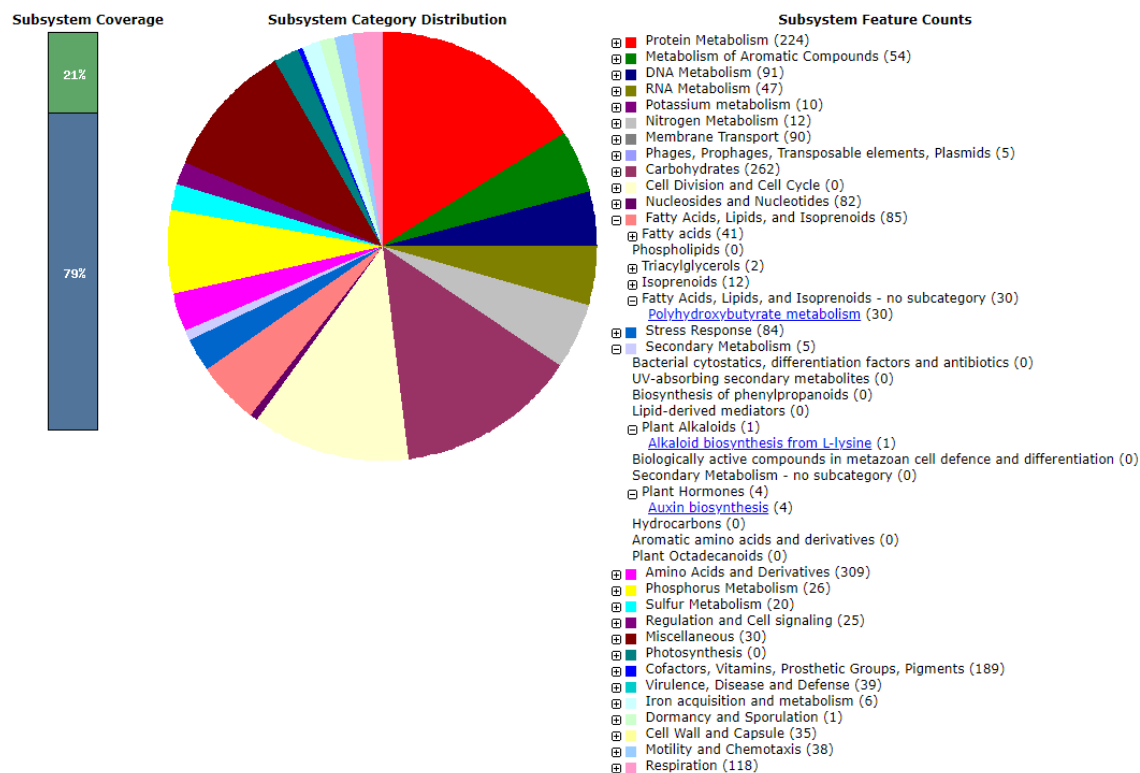

**Figure S5.** Subsystem feature of strain R3-3<sup>T</sup> revealed by RAST (Rapid Annotation using Subsystem Technology) server version 2.0.

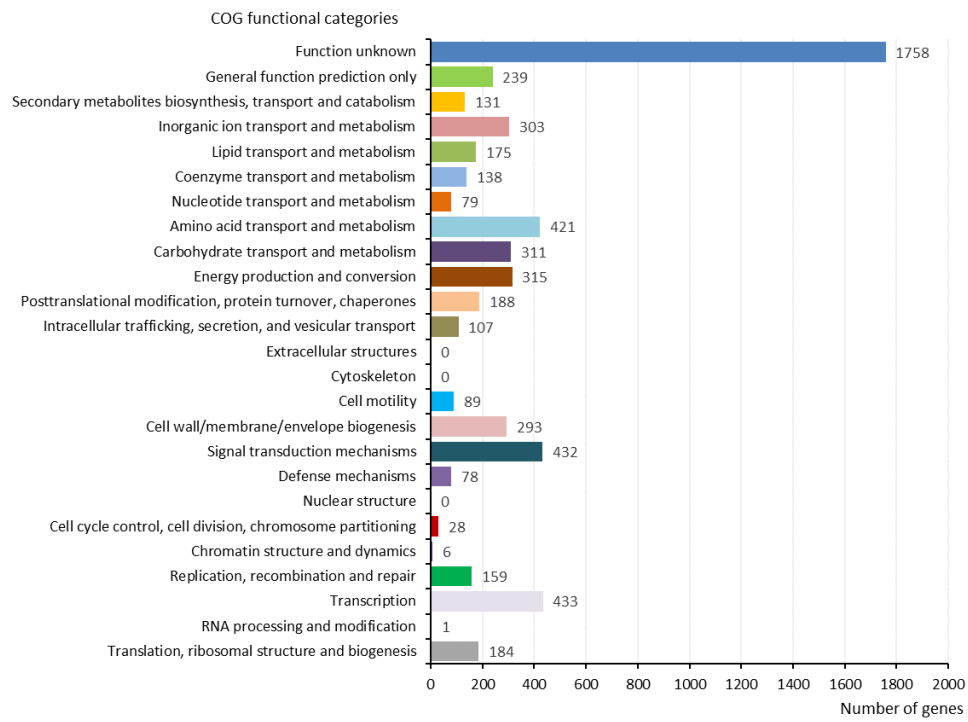

**Figure S6.** COG functional classification of proteins in strains R3-3<sup>T</sup> genome.

**Table S1.** Results from API ZYM, API 20NE test. 1, R3-3<sup>T</sup>; 2, R3-11; 3, *Roseateles toxinovorans* (data are from the present study, except G+C content of reference strains, which were retrieved from the literature in parentheses) [6]; 4, *Roseateles koreensis* [8]; 5, *Roseateles albus* [8]; 6, *Roseateles oligotrophus* [7]. +, positive; -, negative; +/-, weak positive or ambiguous; nd, no data.

| Characteristics                     | 1 | 2 | 3 | 4 | 5 | 6 |
|-------------------------------------|---|---|---|---|---|---|
| <b>Enzymatic reaction (API ZYM)</b> |   |   |   |   |   |   |
| Alkaline phosphate                  | + | + | + | + | + | + |
| Esterase (C4)                       | + | + | + | + | + | w |
| Esterase lipase (C8)                | + | + | + | w | + | w |
| Lipase (C14)                        | - | - | - | - | - | - |
| Leucine arylamidase                 | + | + | + | - | + | + |
| Valine arylamidase                  | w | w | w | - | - | + |
| Cystine arylamidase                 | - | - | w | - | - | + |
| Trypsin                             | - | - | - | - | - | + |
| Alpha chymotrypsin                  | + | + | + | - | - | + |
| Acid phosphatase                    | + | + | w | w | - | + |
| Naphthol-AS-BI- phosphate           | + | + | w | w | w | w |
| Alpha galactosidase                 | - | - | - | - | - | - |
| Beta galactosidase                  | + | + | - | - | - | - |
| Beta glucuronidase                  | - | - | - | - | - | - |
| Alpha glucosidase                   | + | + | - | - | - | - |
| Beta glucosidase                    | w | + | - | - | - | + |
| N-acetyl beta glucosaminidase       | - | - | - | - | - | w |
| Alpha monosidase                    | w | + | - | - | - | - |
| Alpha fucosidase                    | - | - | - | - | - | - |
| <b>API 20NE</b>                     |   |   |   |   |   | - |
| Nitrate reduction                   | - | - | + | + | + | + |
| Indole production                   | - | - | - | - | - | - |
| Glucose fermentation                | - | - | - | - | - | - |
| Arginine dihydrolase                | - | - | + | - | - | - |
| Urease                              | w | w | - | - | - | - |
| Aesculin hydrolysis                 | - | - | - | - | - | + |
| Gelatin hydrolysis                  | - | - | - | + | + | - |
| β - Galactosidase                   | + | + | + | - | - | + |
| Assimilation of                     |   |   |   |   |   |   |
| D-Glucose                           | - | - | - | + | - | - |
| L-Arabinose                         | + | - | - | - | - | + |
| D-Mannose                           | - | - | - | - | - | - |
| D-Mannitol                          | + | + | - | - | - | - |
| N-Acetyl-glucosamine                | - | - | - | - | - | - |
| D-Maltose                           | + | + | + | - | - | - |
| Potassium gluconate                 | - | - | + | - | - | - |
| Capric acid                         | - | - | - | - | - | - |
| Adipic acid                         | - | - | - | - | - | - |
| Malate                              | - | - | w | - | - | - |
| Trisodium citrate                   | - | - | - | - | - | - |

| Characteristics   | 1 | 2 | 3 | 4  | 5  | 6  |
|-------------------|---|---|---|----|----|----|
| Phenylacetic acid | - | - | + | nd | nd | nd |

**Table S2.** Detailed cellular fatty acid profiles (% of totals) of strain 1. R3-3<sup>T</sup> AND 2. R3-11. Fatty acids that represent < 0.1% of the total in all strains are not shown; -, < 0.1% or not detected.

| Fatty acid                | R3-3 <sup>T</sup> | R3-11 |
|---------------------------|-------------------|-------|
| <b>Saturated</b>          |                   |       |
| C <sub>10:0</sub>         | 0.21              | 0.20  |
| C <sub>12:0</sub>         | 2.00              | 2.23  |
| C <sub>14:0</sub>         | 2.89              | 3.10  |
| C <sub>16:0</sub>         | 29.34             | 26.85 |
| C <sub>17:0</sub>         | 0.23              | 0.19  |
| C <sub>18:0</sub>         | 0.45              | 0.37  |
| <b>Unsaturated</b>        |                   |       |
| C <sub>14:1</sub> ω5c     | 0.32              | 0.37  |
| C <sub>15:1</sub> ω6c     | 0.19              | 0.15  |
| <b>Branched-chain</b>     |                   |       |
| iso C <sub>10:0</sub>     | 0.34              | 0.30  |
| iso C <sub>16:0</sub>     | 0.15              | -     |
| anteiso C <sub>15:0</sub> | 0.18              | 0.10  |
| anteiso C <sub>17:0</sub> | 0.10              | -     |
| cyclo C <sub>17:0</sub>   | 7.27              | 3.78  |
| <b>Hydroxy</b>            |                   |       |
| C <sub>10:0</sub> 3OH     | 3.27              | 2.91  |
| C <sub>12:0</sub> 2OH     | 1.03              | 0.82  |
| C <sub>14:0</sub> 2OH     | 1.03              | 0.72  |
| iso C <sub>11:0</sub> 3OH | -                 | 0.11  |
| <b>Summed features*</b>   |                   |       |
| Summed Feature 3          | 37.09             | 43.05 |
| Summed Feature 8          | 13.91             | 14.56 |



**Table S3.** The average nucleotide identity and digital DNA–DNA hybridization value values between strains R3-3<sup>T</sup> and related taxa.

| Strain |                                                     | NCBI accession number | dDDH values were predicated by the Genome to Genome distance calculator |       |       |       |       |       |       |       |       |       |       |       |       |       |       |       |
|--------|-----------------------------------------------------|-----------------------|-------------------------------------------------------------------------|-------|-------|-------|-------|-------|-------|-------|-------|-------|-------|-------|-------|-------|-------|-------|
|        |                                                     |                       | 1                                                                       | 2     | 3     | 4     | 5     | 6     | 7     | 8     | 9     | 10    | 11    | 12    | 13    | 14    | 15    | 16    |
| 1      | R3-3 <sup>T</sup>                                   | AXCLA010000001.1      | -                                                                       | 21.80 | 21.70 | 22.20 | 21.30 | 21.70 | 22.10 | 21.90 | 20.70 | 22.10 | 22.70 | 21.30 | 21.10 | 21.10 | 21.10 | 21.00 |
| 2      | <i>R. aquaticus</i> CCUG 52575 <sup>T</sup>         | SGUG01000098.1        | 78.30                                                                   | -     | 21.5  | 22.20 | 39.10 | 22.10 | 22.10 | 22.00 | 22.40 | 21.90 | 27.80 | 21.60 | 21.40 | 19.80 | 19.80 | 20.20 |
| 3      | <i>R. asaccharophilus</i> DSM 25082 <sup>T</sup>    | SNXE01000001.1        | 77.82                                                                   | 77.39 | -     | 22.40 | 21.50 | 22.20 | 22.30 | 22.20 | 22.80 | 22.50 | 21.20 | 22.50 | 22.00 | 22.00 | 20.10 | 22.80 |
| 4      | <i>R. chitosanitabidus</i> NBRC 102408 <sup>T</sup> | BCYP01000001.1        | 77.59                                                                   | 77.10 | 77.46 | -     | 22.30 | 28.70 | 28.80 | 28.40 | 21.10 | 25.10 | 21.70 | 24.10 | 23.60 | 20.30 | 20.50 | 20.50 |
| 5      | <i>R. saccharophilus</i> DSM 654 <sup>T</sup>       | SMBU01000001.1        | 77.50                                                                   | 89.80 | 77.42 | 77.37 | -     | 21.80 | 22.10 | 22.00 | 20.40 | 21.90 | 26.50 | 21.50 | 21.50 | 19.70 | 19.80 | 20.90 |
| 6      | <i>R. chitinivorans</i> HWN-4 <sup>T</sup>          | PEOG01000001.1        | 77.49                                                                   | 77.07 | 77.34 | 84.41 | 76.99 | -     | 28.60 | 31.10 | 21.00 | 25.20 | 21.40 | 23.80 | 23.60 | 20.20 | 20.40 | 20.40 |
| 7      | <i>R. aquatilis</i> CCUG 48205 <sup>T</sup>         | NIOF01000011.1        | 77.29                                                                   | 77.29 | 77.33 | 84.55 | 76.96 | 84.34 | -     | 28.40 | 20.90 | 25.60 | 21.30 | 24.20 | 24.00 | 20.20 | 20.60 | 20.50 |
| 8      | <i>R. noduli</i> HZ7 <sup>T</sup>                   | NIOE01000013.1        | 77.03                                                                   | 77.04 | 76.80 | 84.23 | 76.93 | 86.07 | 84.08 | -     | 20.90 | 24.80 | 21.20 | 23.30 | 23.20 | 20.10 | 20.40 | 20.30 |
| 9      | <i>R. toxinivorans</i> DSM 16998 <sup>T</sup>       | SNXS01000001.1        | 76.56                                                                   | 76.30 | 76.88 | 75.95 | 75.95 | 75.93 | 75.95 | 75.58 | -     | 21.30 | 20.20 | 20.80 | 20.50 | 19.90 | 19.90 | 20.30 |
| 10     | <i>R. amylovorans</i> BIM B-1768 <sup>T</sup>       | CP104562.2            | 76.46                                                                   | 76.32 | 77.07 | 80.94 | 76.05 | 81.23 | 81.58 | 80.68 | 75.79 | -     | 21.40 | 24.70 | 24.50 | 21.20 | 21.20 | 21.20 |
| 11     | <i>R. puraquae</i> CCUG 52769 <sup>T</sup>          | NISI01000012.1        | 76.44                                                                   | 84.09 | 76.70 | 76.36 | 83.30 | 76.13 | 76.10 | 75.68 | 75.16 | 75.54 | -     | 21.50 | 21.00 | 19.70 | 19.50 | 20.30 |
| 12     | <i>R. depolymerans</i> KCTC 42856 <sup>T</sup>      | CP013729.1            | 76.24                                                                   | 76.27 | 76.91 | 79.89 | 76.00 | 79.90 | 79.97 | 79.25 | 75.75 | 80.24 | 75.88 | -     | 30.30 | 20.50 | 20.50 | 20.70 |
| 13     | <i>R. terrae</i> CECT 7247 <sup>T</sup>             | JACHXO010000001.1     | 75.64                                                                   | 75.41 | 76.61 | 79.23 | 75.54 | 79.52 | 79.68 | 79.05 | 75.08 | 79.84 | 75.40 | 85.04 | -     | 20.10 | 20.40 | 20.80 |
| 14     | <i>R. albus</i> hw1 <sup>T</sup>                    | JAQQXT010000001.1     | 75.61                                                                   | 74.74 | 75.30 | 74.45 | 74.65 | 74.59 | 74.54 | 74.10 | 75.02 | 74.46 | 73.95 | 74.13 | 74.07 | -     | 27.50 | 20.20 |
| 15     | <i>R. oligotrophus</i> CHU3 42519 <sup>T</sup>      | JAJIRN010000001.1     | 75.61                                                                   | 74.81 | 75.28 | 74.72 | 74.69 | 74.70 | 74.72 | 74.42 | 75.26 | 74.42 | 73.95 | 74.16 | 73.98 | 84.12 | -     | 20.30 |
| 16     | <i>R. korensis</i> hw8 <sup>T</sup>                 | JAQQXS010000001.1     | 75.14                                                                   | 74.46 | 75.48 | 74.29 | 74.45 | 74.39 | 74.38 | 74.37 | 74.58 | 74.28 | 74.22 | 74.38 | 74.33 | 75.45 | 75.68 | -     |
|        |                                                     |                       | ANI was computed from the protein-coding gene of the genomes            |       |       |       |       |       |       |       |       |       |       |       |       |       |       |       |
